# Supplementary material
Source: ML conference proceedings conference paper supplement (https://aclanthology.org/2026.semeval-1.402)

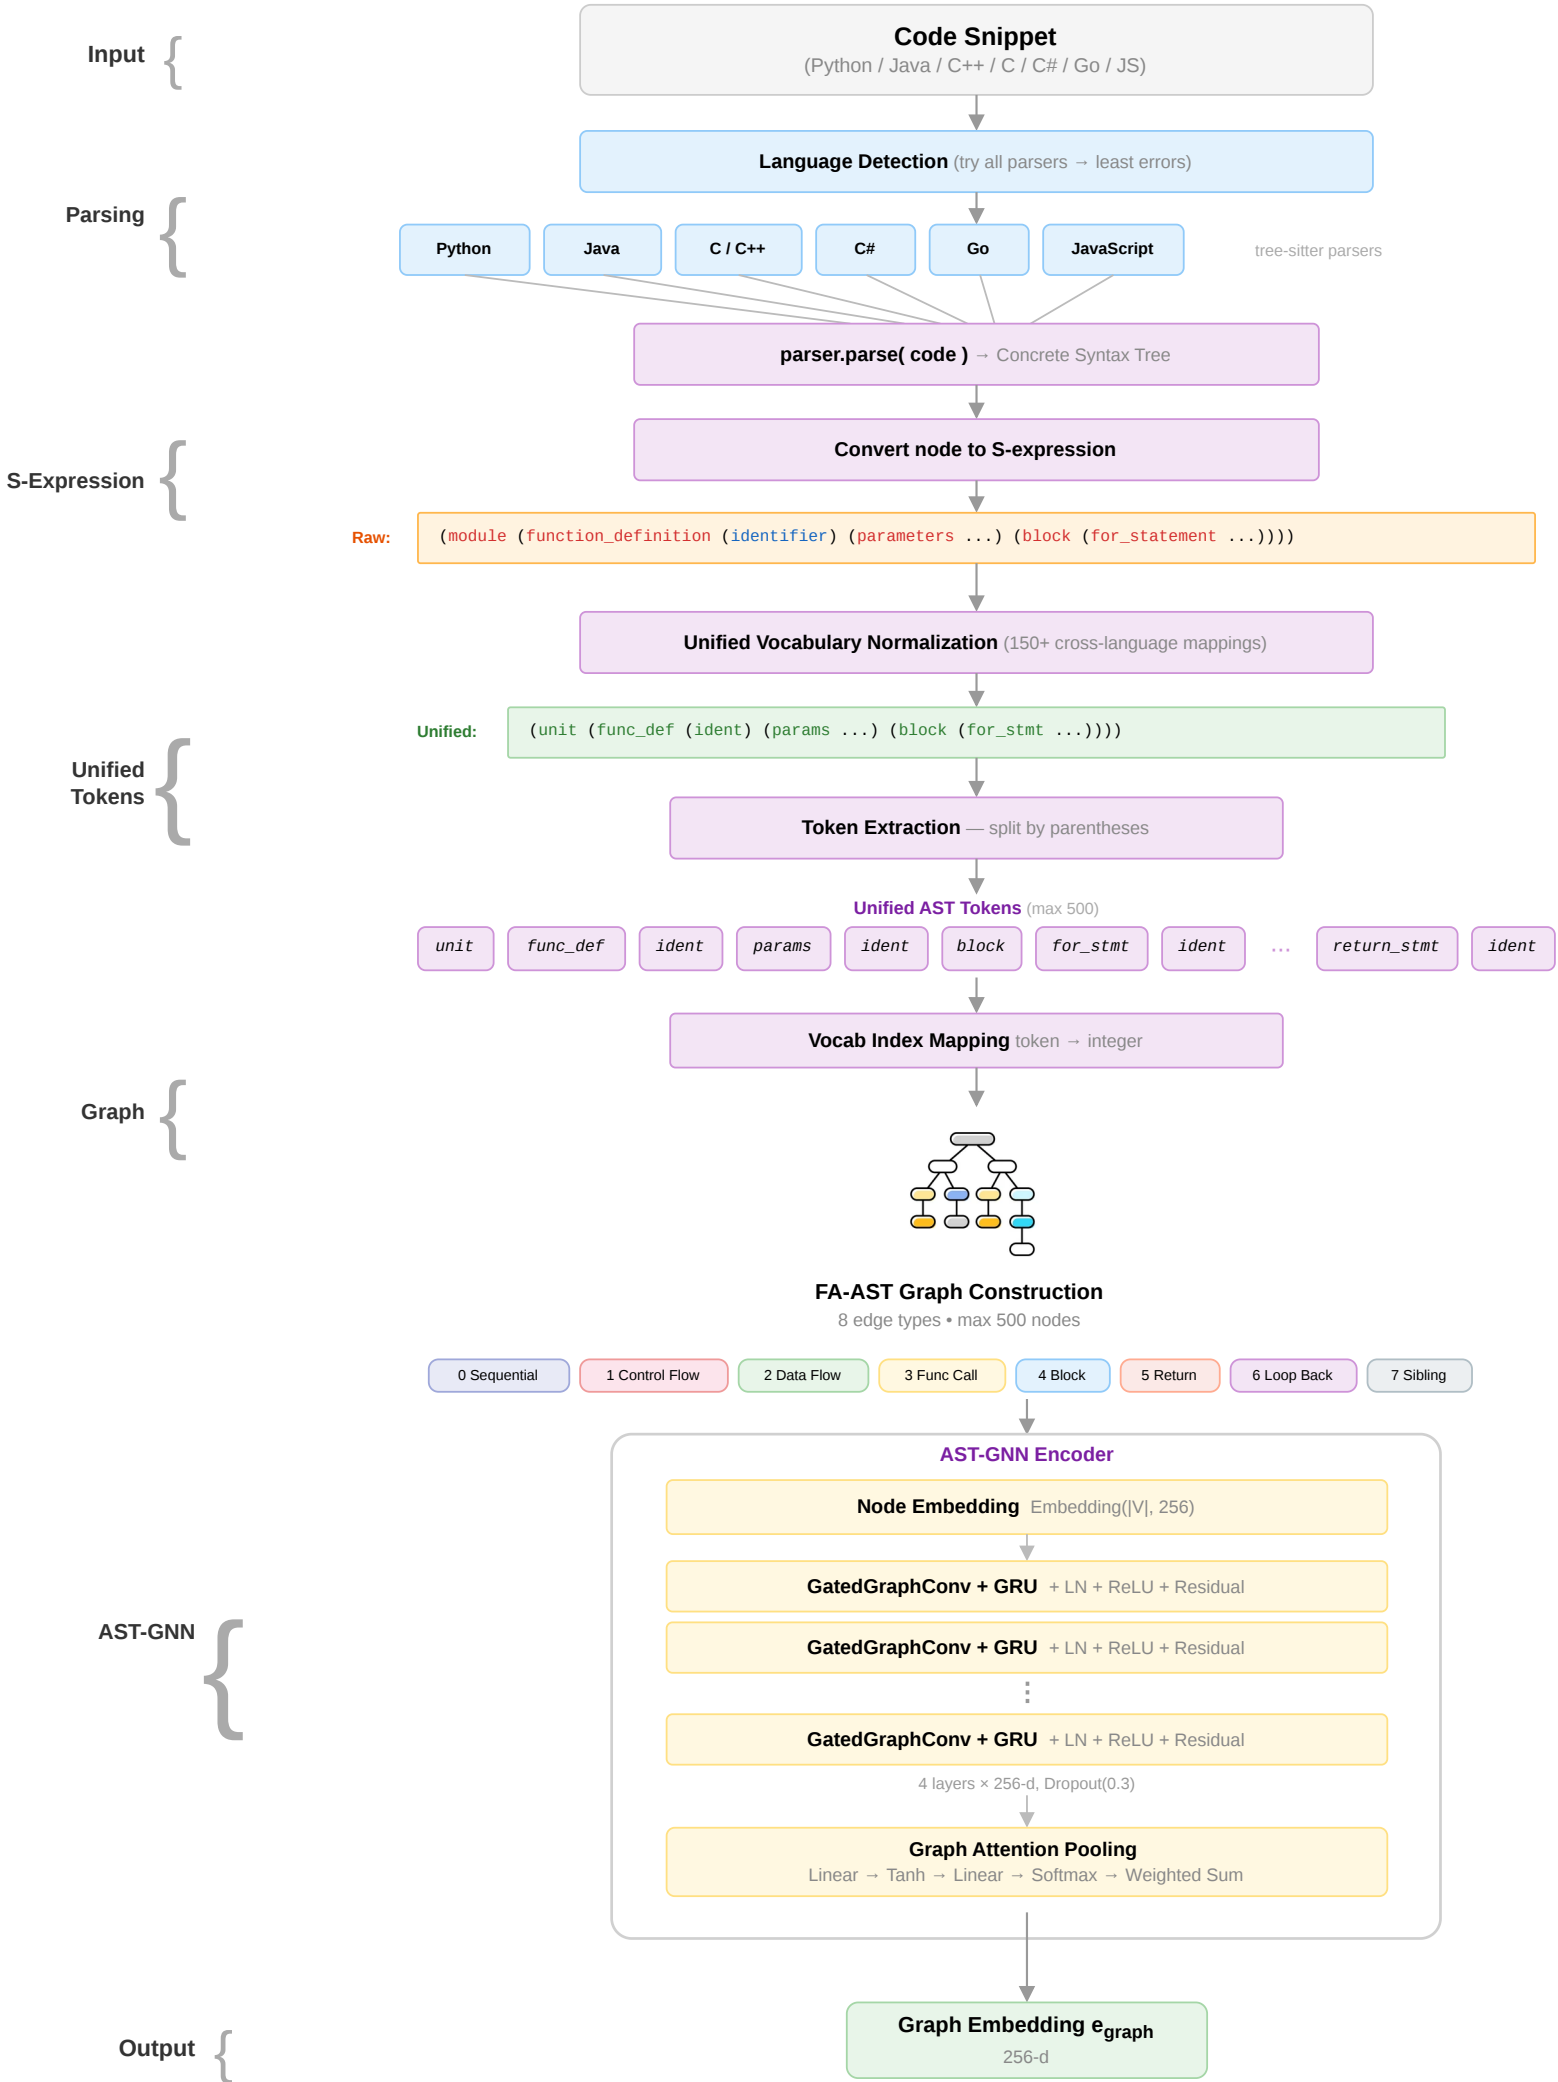

AST Pipeline — Code Snippet to Graph Embedding (256-d)

Supplement: SupplementaryMaterial [file ast.pdf › latex/figures/ast.pdf]

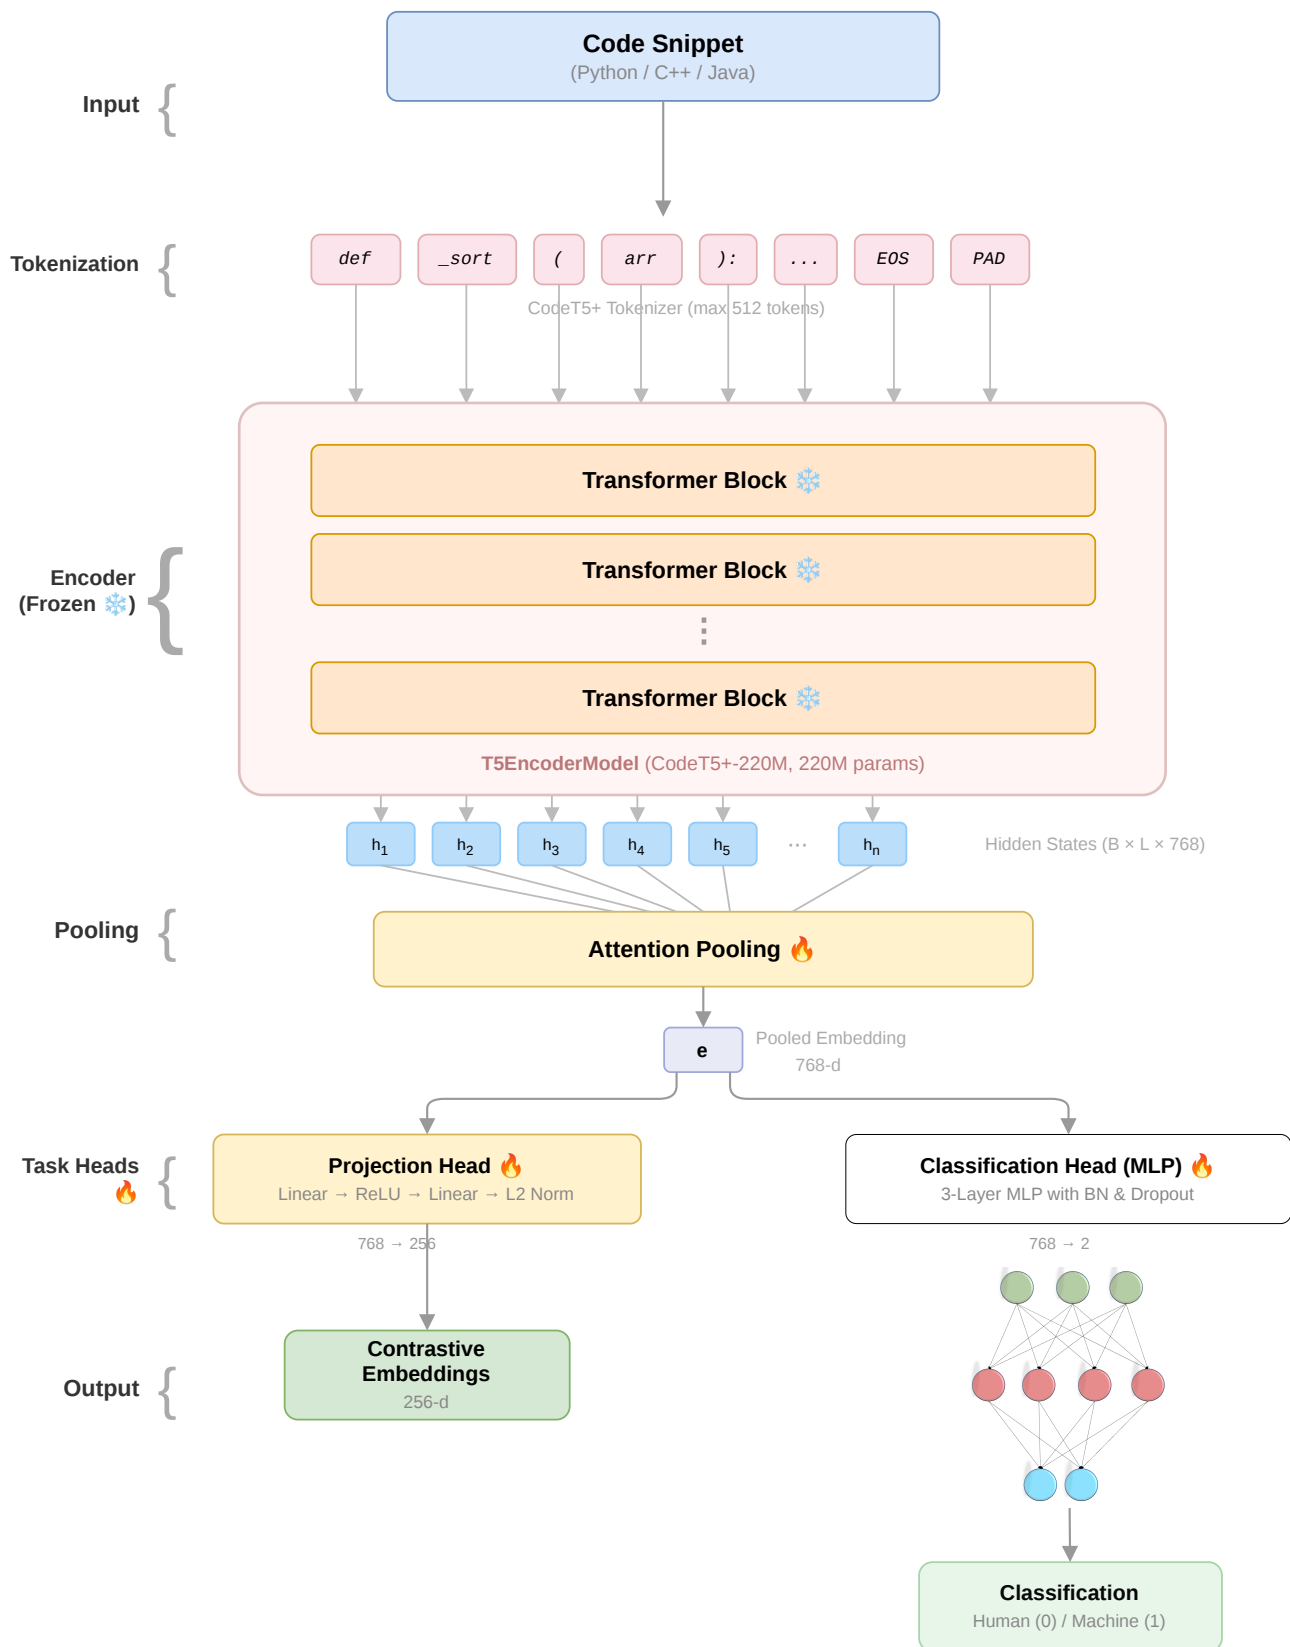

Subtask A: Binary Machine-Generated Code Detection — Model Architecture

Supplement: SupplementaryMaterial [file transformer_encoder_classification.pdf › latex/figures/transformer_encoder_classification.pdf]
